# Supplementary material
Source: PubMed Central journal article supplement (PMC3051010)
Supplement: NIHMS267860-supplement-1_si_001.pdf [file NIHMS267860-supplement-1_si_001.pdf]

# Supporting Information

## Genome Mining in *Streptomyces*. Elucidation of the Role of Baeyer-Villiger Monooxygenases and Non-Heme Iron-Dependent Dehydrogenase/Oxygenases in the Final Steps of the Biosynthesis of Pentalenolactone and Neopentalenolactone<sup>†</sup>

*Myung-Ji Seo,<sup>‡¶</sup> Dongqing Zhu,<sup>‡¶</sup> Saori Endo,<sup>§</sup> Haruo Ikeda,<sup>§\*</sup> and David E. Cane<sup>‡\*</sup>*

<sup>‡</sup>Department of Chemistry, Box H, Brown University, Providence, RI 02912-9108, USA

<sup>§</sup>Laboratory of Microbial Engineering, Kitasato Institute for Life Sciences, Kitasato University, 1-15-1 Kitasato, Sagamihara, Minami-ku, Kanagawa 252-0373, Japan

<sup>¶</sup>These authors contributed equally to this work.

[David\\_Cane@brown.edu](mailto:David_Cane@brown.edu), [ikeda@ls.kitasato-u.ac.jp](mailto:ikeda@ls.kitasato-u.ac.jp)

**Table S1.** Strains, plasmids and cosmids used in this study.

| Strain or plasmid                                              | Relevant phenotype and/or characteristics                                                                               | Source                               |
|----------------------------------------------------------------|-------------------------------------------------------------------------------------------------------------------------|--------------------------------------|
| <i>S. exfoliatus</i> strains                                   |                                                                                                                         |                                      |
| UC5319                                                         | Wild-type, pentalenolactone producer                                                                                    | Upjohn Co (Pfizer) (1)               |
| ZD20                                                           | <i>penD</i> in-frame deletion mutant                                                                                    | This work                            |
| <i>S. arenae</i> strains                                       |                                                                                                                         |                                      |
| TÜ469                                                          | Wild-type, pentalenolactone producer                                                                                    | DSM 40734, DMSZ Braunschweig, DE (2) |
| ZD17                                                           | <i>pntD</i> mutant, Apra <sup>+</sup>                                                                                   | This work                            |
| ZD18                                                           | <i>pntD</i> in-frame deletion mutant                                                                                    | This work                            |
| <i>S. avermitilis</i> strain                                   |                                                                                                                         |                                      |
| SUKA16::pKU462- <i>ermEp-ptl_cluster-ΔptlE</i>                 | In-frame <i>ptlE</i> mutant                                                                                             | (3)                                  |
| SUKA16::pKU462- <i>ermEp-ptl_cluster-ΔptlED</i>                | In-frame <i>ptlED</i> mutant                                                                                            | (3)                                  |
| SUKA16::pKU462- <i>ermEp-ptl_cluster-ΔptlED ermEp-penE</i>     | Complementation with <i>penE</i>                                                                                        | This work                            |
| SUKA16::pKU462- <i>ermEp-ptl_cluster-ΔptlED ermEp-pntE</i>     | Complementation with <i>pntE</i>                                                                                        | This work                            |
| SUKA16::pKU462- <i>ermEp-ptl_cluster-ΔptlED ermEp-penEpenD</i> | Complementation with <i>penE</i> and <i>penD</i>                                                                        | This work                            |
| <i>E. coli</i> strains                                         |                                                                                                                         |                                      |
| DH10B                                                          | <i>recA</i>                                                                                                             | Gibco BRL                            |
| BL21(DE3)                                                      | <i>dcm, ompT, hsdS</i> (r <sub>B</sub> <sup>-</sup> m <sub>B</sub> <sup>-</sup> ), <i>gal</i>                           | Invitrogen                           |
| ET12567/pUZ8002                                                | <i>dam, dcm, hsdS, cat, tet</i> ; pUZ8002: <i>tra, neo</i> , RP4                                                        | (4, 5)                               |
| BW25117/pIJ790                                                 | K12 derivative: <i>ΔaraBAD, ΔrhaBAD</i> ; pIJ790: λ-RED ( <i>gam, bet, exo</i> ), <i>cat, araC, rep101<sup>ts</sup></i> | (6, 7)                               |

| Plasmids            | Relevant phenotype and/or characteristics                                                                                                                                                        | Source    |
|---------------------|--------------------------------------------------------------------------------------------------------------------------------------------------------------------------------------------------|-----------|
| pET-26b             | Kan <sup>+</sup> , <i>ori</i> <sup>f1</sup> , <i>lacI</i> , <i>ori</i> <sup>pBR322</sup> , T7 promoter                                                                                           | Novagen   |
| pET-28a             | Kan <sup>+</sup> , <i>ori</i> <sup>f1</sup> , <i>lacI</i> , <i>ori</i> <sup>pBR322</sup> , T7 promoter                                                                                           | Novagen   |
| pBluescriptII SK(+) | <i>bla</i> , <i>ori</i> <sup>f1</sup> , <i>lacZ</i> , <i>Plac</i> , <i>ori</i> <sup>pUC</sup>                                                                                                    | (8, 9)    |
| pHZ1357             | pIJ101 derivative, <i>bla</i> , <i>tsr</i> , <i>cos</i> , <i>oriT</i> , <i>sti</i>                                                                                                               | (10)      |
| pSET152             | <i>aac(3)IV</i> , <i>lacZ</i> , <i>rep</i> <sup>pUC</sup> , <i>oriT</i> , <i>att</i> <sup>φC31</sup>                                                                                             | (11)      |
| pJTU1278            | <i>pIJ101</i> derivative, <i>bla</i> , <i>tsr</i> , <i>oriT</i> , <i>sti</i>                                                                                                                     | (12)      |
| pIJ773              | <i>aac(3)IV</i> , <i>rep</i> <sup>pUC</sup> , <i>oriT</i>                                                                                                                                        | (6)       |
| pDQ7                | ca. 6.2 kb BamHI DNA fragment harboring partial <i>pntM</i> , <i>pntH</i> , <i>pntG</i> , <i>pntF</i> , <i>pntE</i> and partial <i>pntD</i> from cosmid 21F7 inserted into BamHI site of pSET152 | This work |
| pDQ9                | ca. 2.2 kb BamHI DNA fragment harboring partial <i>orf - I</i> from cosmid 21F7 inserted into BamHI site of pSET152                                                                              | This work |
| pDQ19               | ca. 2.2 kb BamHI DNA fragment harboring partial <i>orf - I</i> from cosmid 1E2 inserted into BamHI site of pSET152, same as pDQ9                                                                 | This work |
| pDQ20               | ca. 3.1 kb BamHI DNA fragment harboring partial <i>orf - I</i> , <i>pntR</i> , <i>gapR</i> , and partial <i>pntM</i> from cosmid 1E2 inserted into BamHI site of pSET152                         | This work |

| Plasmids | Relevant phenotype and/or characteristics                                                                                                                                                                                                            | Source    |
|----------|------------------------------------------------------------------------------------------------------------------------------------------------------------------------------------------------------------------------------------------------------|-----------|
| pDQ22    | ca. 6.2 kb BamHI DNA fragment harboring partial <i>pntM</i> , <i>pntH</i> , <i>pntG</i> , <i>pntF</i> , <i>pntE</i> and partial <i>pntD</i> from cosmid 1E2 inserted into BamHI site of pSET152, same as pDQ7                                        | This work |
| pDQ23    | ca. 6.4 kb BamHI DNA fragment harboring partial <i>pntD</i> , <i>pntB</i> , <i>pntA</i> , <i>pntI</i> , <i>orf 1</i> and partial <i>orf 2</i> ( <i>orf 2</i> , not shown) from cosmid 1E2 inserted into BamHI site of pSET152                        | This work |
| pDQ31    | ca. 6.8 kb KpnI DNA fragment harboring partial <i>pntI</i> , <i>orf 1</i> , <i>orf 2</i> , <i>orf 3</i> , <i>orf 4</i> , and partial <i>orf 5</i> ( <i>orf 2 – orf 5</i> , not shown) from cosmid 7D7 inserted into KpnI site of pBluescriptII SK(+) | This work |
| pDQ34    | ca. 6.8 kb KpnI DNA fragment harboring partial <i>pntI</i> , <i>orf 1</i> , <i>orf 2</i> , <i>orf 3</i> , <i>orf 4</i> , and partial <i>orf 5</i> ( <i>orf 2 – orf 5</i> , not shown) from cosmid 7D7 inserted into KpnI site of pBluescriptII SK(+) | This work |
| pDQ44    | pJTU1278 digested with XbaI and SpeI, and self-ligated                                                                                                                                                                                               | This work |
| pDQ45    | ca. 6412 bp KpnI DNA fragment harboring <i>pntD</i> from pDQ34 inserted into the KpnI site of pDQ44                                                                                                                                                  | This work |
| pDQ46    | 822 bp DNA fragment of <i>pntD</i> from 40 nt to 861 nt of pDQ45 replaced by ca. 1369 bp <i>oriT</i> and <i>aac(3)IV</i> using PCR targeting system                                                                                                  | This work |
| pDQ47    | pDQ46 digested with XbaI and self ligated to delete <i>oriT</i> and <i>aac(3)IV</i>                                                                                                                                                                  | This work |

| Plasmids                                    | Relevant phenotype and/or characteristics                                                                                                                                                               | Source            |
|---------------------------------------------|---------------------------------------------------------------------------------------------------------------------------------------------------------------------------------------------------------|-------------------|
| pDQ49                                       | ca. 7 kb BamHI + HindIII DNA fragment harboring <i>penD</i> from p56 inserted into the corresponding site of pDQ44                                                                                      | This work         |
| pDQ50                                       | Internal 819 bp of <i>penD</i> from 40 nt to 858 nt on pDQ49 replaced by ca. 1369 bp <i>oriT</i> and <i>aac(3)IV</i> using PCR targeting system                                                         | This work         |
| pDQ51                                       | pDQ50 digested with XbaI and self ligated to delete <i>oriT</i> and <i>aac(3)IV</i>                                                                                                                     | This work         |
| p56                                         | ca. 6.9 kb PstI DNA fragment harboring partial <i>penG</i> , <i>penF</i> , <i>penE</i> , <i>penD</i> , <i>penB</i> , <i>penA</i> and partial <i>penI</i> inserted into PstI site of pBluescriptII SK(+) | This work         |
| pKU464 <i>aac(3)IV::ermEp::penE</i>         | <i>ermEp-penE</i>                                                                                                                                                                                       | This work         |
| pKU464 <i>aac(3)IV::ermEp::pntE</i>         | <i>ermEp-pntE</i>                                                                                                                                                                                       | This work         |
| pKU464 <i>aac(3)IV::ermEp::penE-penD</i>    | <i>ermEp-penED</i>                                                                                                                                                                                      | This work         |
| pKU464 <i>aac(3)IV::ermEp::pntE-pntD</i>    | <i>ermE-pntED</i>                                                                                                                                                                                       | This work         |
| pKU464 <i>aac(IV)::ermEp::ptlE/pntE300</i>  | <i>ermEp-ptlE/pntE300</i>                                                                                                                                                                               | This work         |
| pKU464 <i>aac(IV)::ermEp::ptlE/pntE600</i>  | <i>ermEp-ptlE/pntE600</i>                                                                                                                                                                               | This work         |
| pKU464 <i>aac(IV)::ermEp::ptlE/pntE1200</i> | <i>ermEp-ptlE/pntE1200</i>                                                                                                                                                                              | This work         |
| pJexpress401-PenE_opt_alt2                  | <i>ori</i> <sup>pUC</sup> , Kan <sup>+</sup> , <i>lacI</i> , synthetic <i>penE</i>                                                                                                                      | DNA2.0, this work |
| pJexpress401-PntE_opt_alt2                  | <i>ori</i> <sup>pUC</sup> , Kan <sup>+</sup> , <i>lacI</i> , synthetic <i>pntE</i>                                                                                                                      | DNA2.0, this work |
| pJexpress401-PenD_opt_alt2                  | <i>ori</i> <sup>pUC</sup> , Kan <sup>+</sup> , <i>lacI</i> , synthetic <i>penD</i>                                                                                                                      | DNA2.0, this work |
| pJexpress401-PntD_opt_alt2                  | <i>ori</i> <sup>pUC</sup> , Kan <sup>+</sup> , <i>lacI</i> , synthetic <i>pntD</i>                                                                                                                      | DNA2.0, this work |
| pJ201-PtlD                                  | <i>ori</i> <sup>pUC</sup> , Kan <sup>+</sup> , <i>lacI</i> , synthetic <i>ptlD</i>                                                                                                                      | DNA2.0, this work |

| Plasmids     | Relevant phenotype and/or characteristics                                                                                                                                  | Source    |
|--------------|----------------------------------------------------------------------------------------------------------------------------------------------------------------------------|-----------|
| pET-28a-penE | Synthetic <i>penE</i> gene from pJexpress401:PenE_opt_alt2 digested with NdeI and XhoI and inserted into the corresponding site of pET28a                                  | This work |
| pDQ58        | Synthetic <i>pntE</i> gene from pJexpress401:PntE_opt_alt2 amplified with primer DQ75F/R, digested with NdeI and XhoI, and inserted into the corresponding site of pET-26b | This work |
| pET-28a-penD | Synthetic <i>penD</i> gene from pJexpress401-PenD_opt_alt2 digested with NdeI and XhoI and inserted into the corresponding site of pET-28a                                 | This work |
| pET-28a-pntD | Synthetic <i>pntD</i> gene from pJexpress401-PntD_opt_alt2 digested with NdeI and XhoI and inserted into the corresponding site of pET-28a                                 | This work |
| pET-28a-ptlD | Synthetic <i>ptlD</i> gene from pJ201-PtlD digested with NdeI and XhoI and inserted into the corresponding site of pET-28a                                                 | This work |
| 1E2          | pHZ1357 derivative, cosmid harboring <i>pnt</i> gene cluster                                                                                                               | This work |
| 7D7          | pHZ1357 derivative, cosmid harboring <i>pnt</i> gene cluster                                                                                                               | This work |
| 12B2         | pHZ1357 derivative, cosmid harboring <i>pnt</i> gene cluster                                                                                                               | This work |
| 21A5         | pHZ1357 derivative, cosmid harboring <i>pnt</i> gene cluster                                                                                                               | This work |
| 21F7         | pHZ1357 derivative, cosmid harboring <i>pnt</i> gene cluster                                                                                                               | This work |
| 27H6         | pHZ1357 derivative, cosmid harboring <i>pnt</i> gene cluster                                                                                                               | This work |
| G21          | pHZ1357 derivative, cosmid harboring <i>pen</i> gene cluster                                                                                                               | This work |

| Plasmids | Relevant phenotype and/or characteristics                            | Source    |
|----------|----------------------------------------------------------------------|-----------|
| K5       | pHZ1357 derivative, cosmid harboring partial <i>pen</i> gene cluster | This work |
| O34      | pHZ1357 derivative, cosmid harboring partial <i>pen</i> gene cluster | This work |

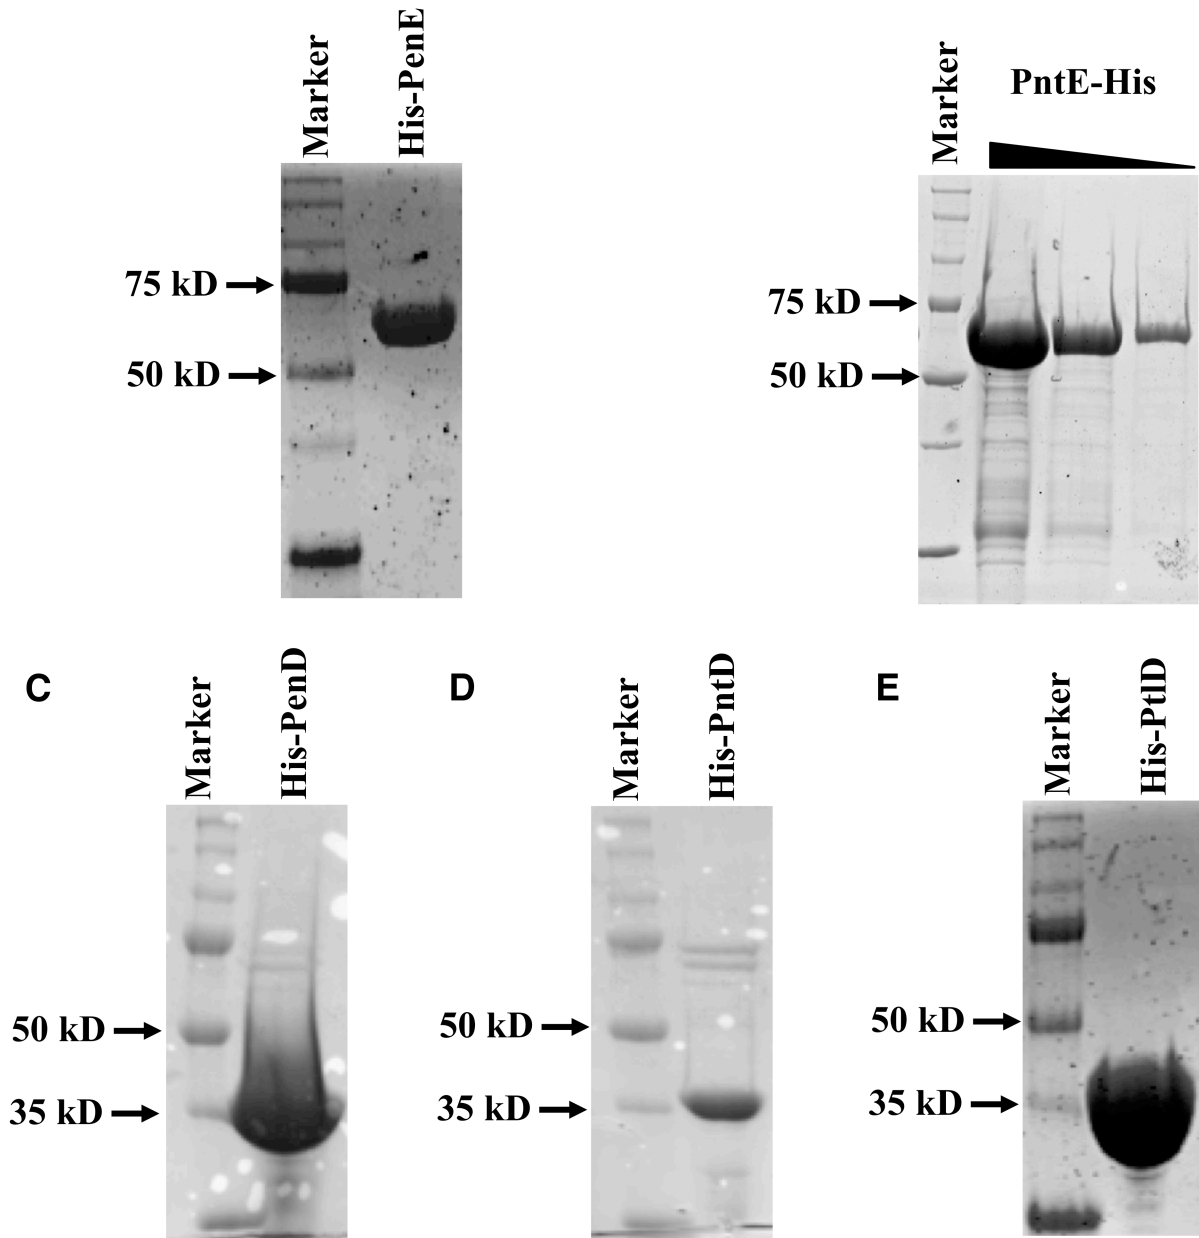

**Figure S1.** SDS PAGE of purified recombinant proteins. A. His<sub>6</sub>-tag-PenE. B. PntE-His<sub>6</sub>-tag; C. His<sub>6</sub>-tag-PenD. D. His<sub>6</sub>-tag-PntD. E. His<sub>6</sub>-tag-PtID.



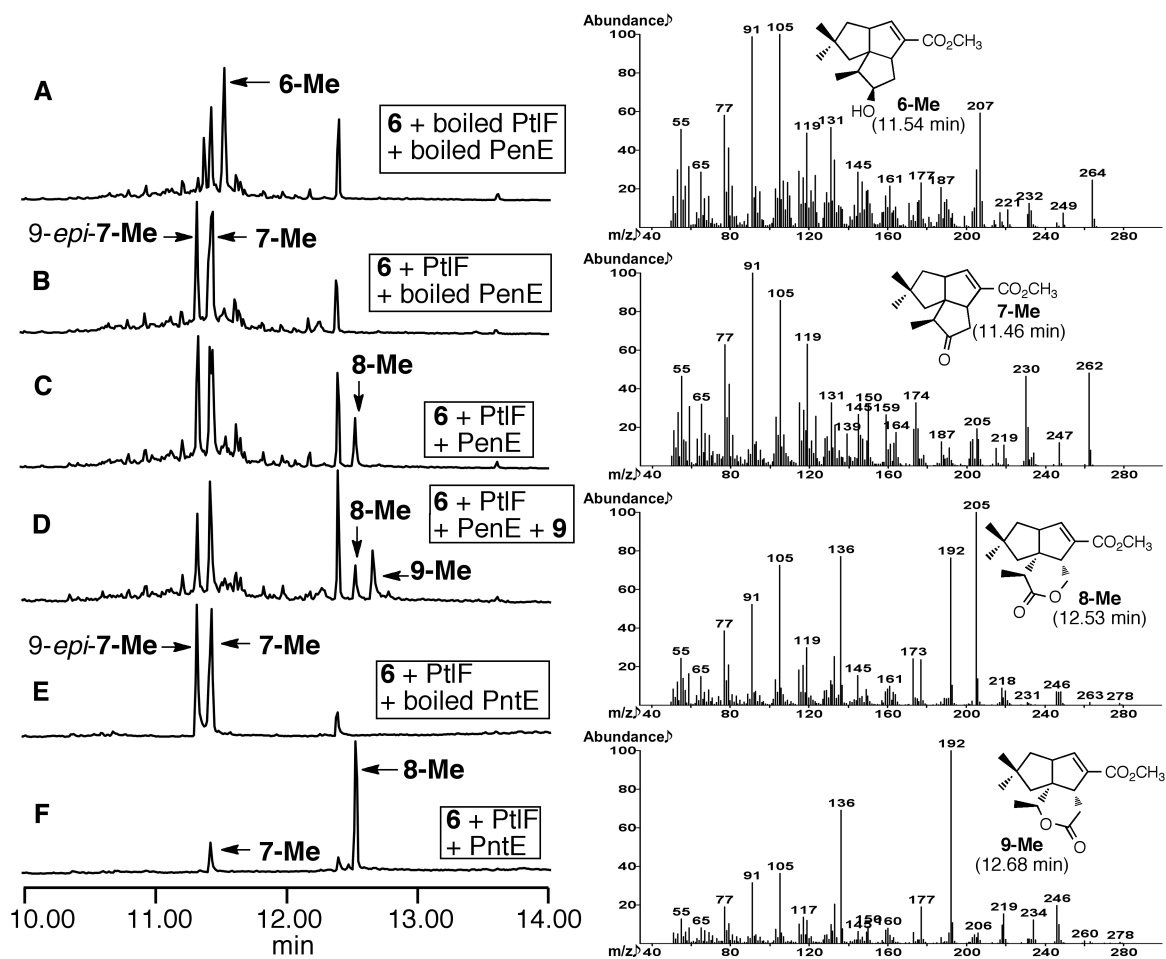

**Figure S2.** GC-MS analysis (Method 1) of incubations of recombinant PenE and PntE with 1-deoxy-11-oxopentalenic acid (**7**). A. Control incubation of **6** with boiled PtlF and boiled PenE. B. Control incubation of **6** with PtlF and boiled PenE. C. Incubation of **6** with PtlF and PenE. D. Incubation of **6** with PtlF and PenE with added reference **9**. E. Control incubation of **6** with PtlF and boiled PntE. F. Incubation of **6** with PtlF and PntE. Mass spectra of the individual components are given in right panel. For mass spectra of authentic **8-Me** and **9-Me**, see Figure S2 of supplemental ref. 3

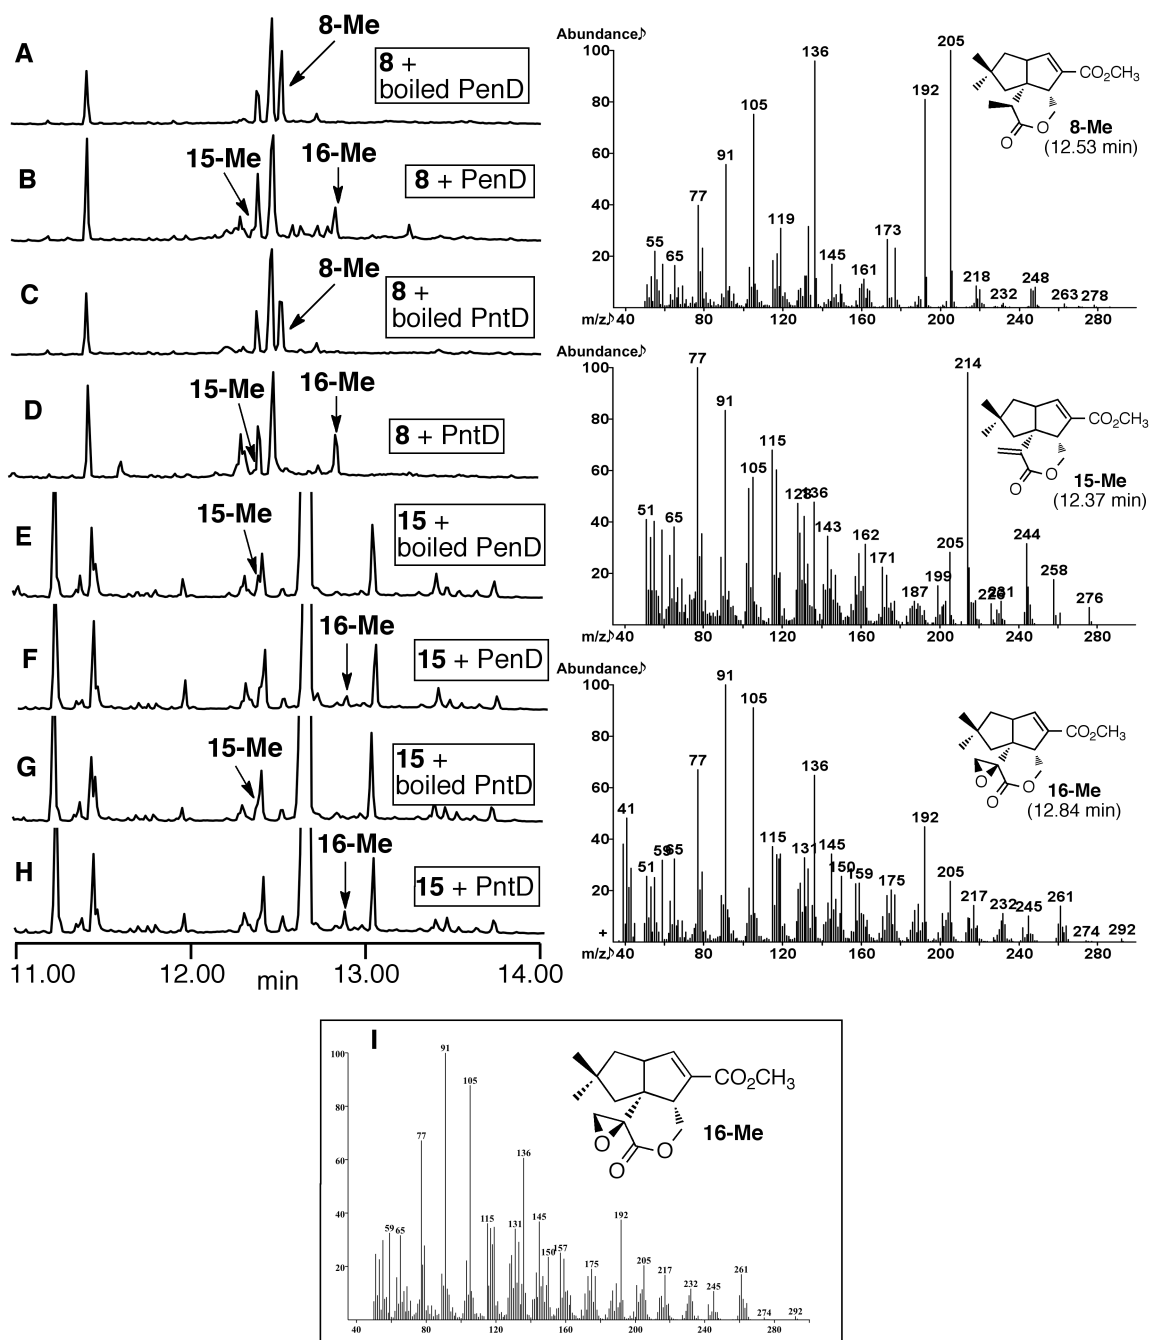

**Figure S3.** GC-MS analysis (Method 1) of incubations of recombinant PenD and PntD with pentalenolactone D (**8**) and with pentalenolactone E (**15**). A. Control incubation of **8** with boiled PenD. B. Incubation of **8** with PenD. C. Control incubation of **8** with boiled PntD. D. Incubation of **8** with PntD. E. Control incubation of **15** with boiled PenD. F. Incubation of **15** with PenD. G. Control incubation of **15** with boiled PntD. H. Incubation of **15** with PntD. I. MS of authentic reference **16-Me**.

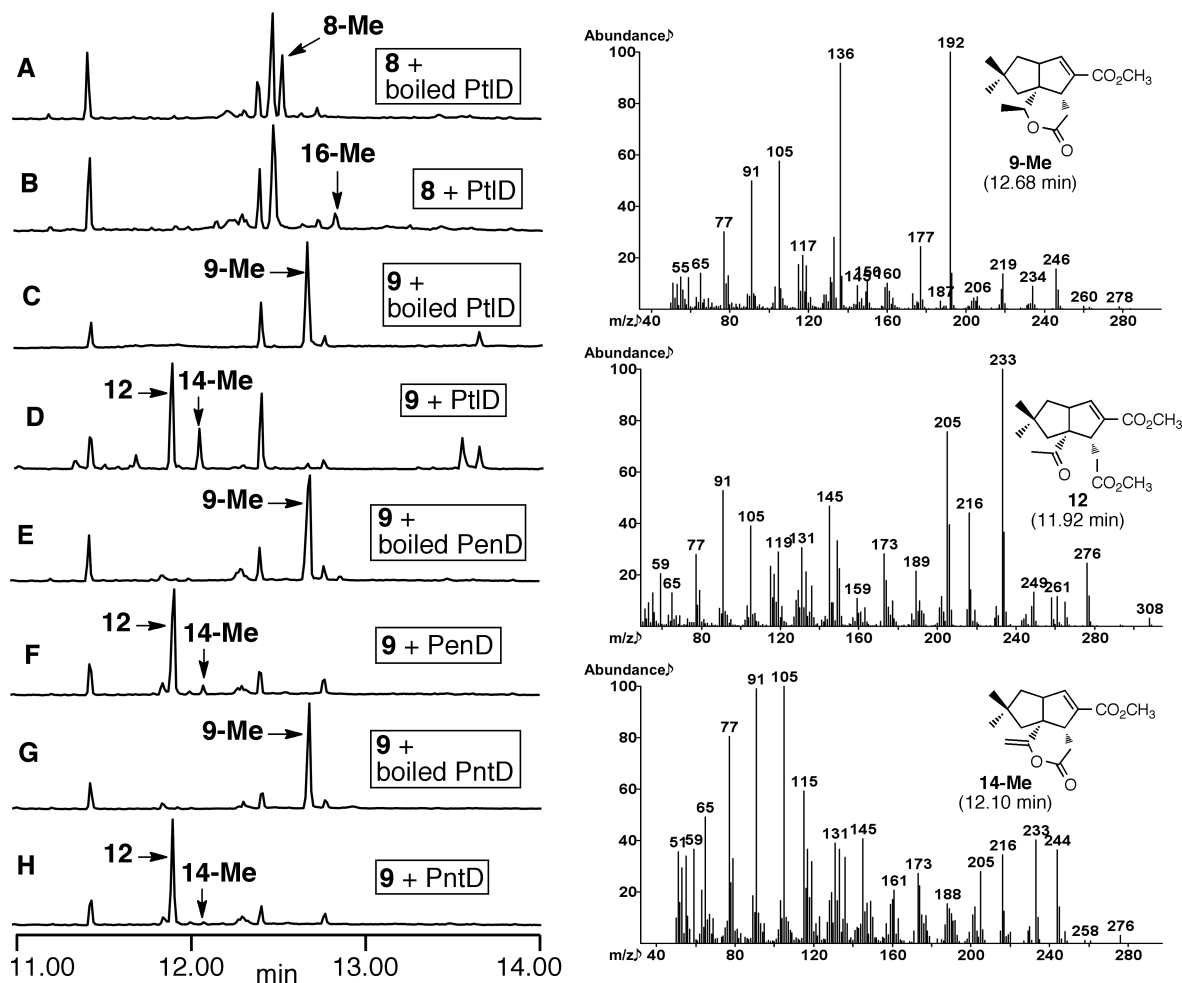

**Figure S4.** GC-MS analysis (Method 1) of incubations of recombinant PtID with pentalenolactone D (**8**) and PtID, PenD, and PntD with with neopentalenolactone D (**9**). A. Control incubation of **8** with boiled PtID. B. Incubation of **8** with PtID. C. Control incubation of **9** with boiled PtID. D. Incubation of **9** with PtID. E. Control incubation of **9** with boiled PenD. F. Incubation of **9** with PenD. G. Control incubation of **9** with boiled PntD. H. Incubation of **9** with PntD.

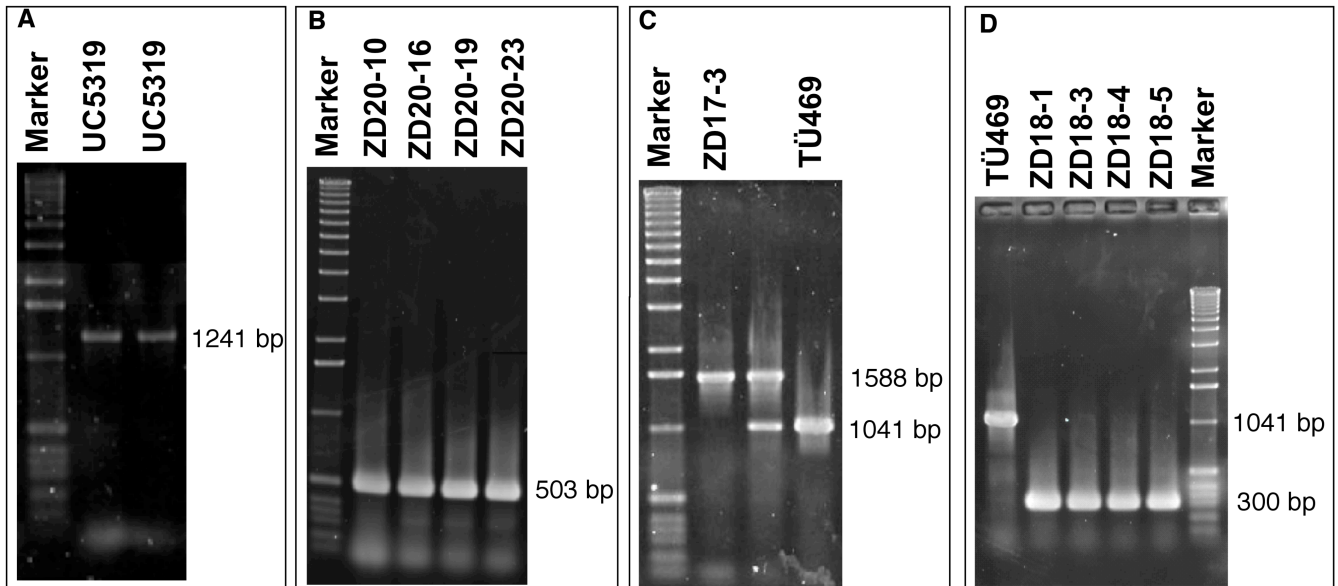

**Figure S5.** PCR analysis of wild-type and *penD* or *pntD* deletion mutants. A. *S. exfoliatus* UC5319, primer pair DQ81F/R. B. *S. exfoliatus* ZD20 ( $\Delta penD$ ), primer pair DQ81F/R. C. *S. arenae* TÜ469 and ZD-17, primer pair DQ80F/R. D. *S. arenae* TÜ469 and ZD-18 ( $\Delta pntD$ ), primer pair DQ80F/R.

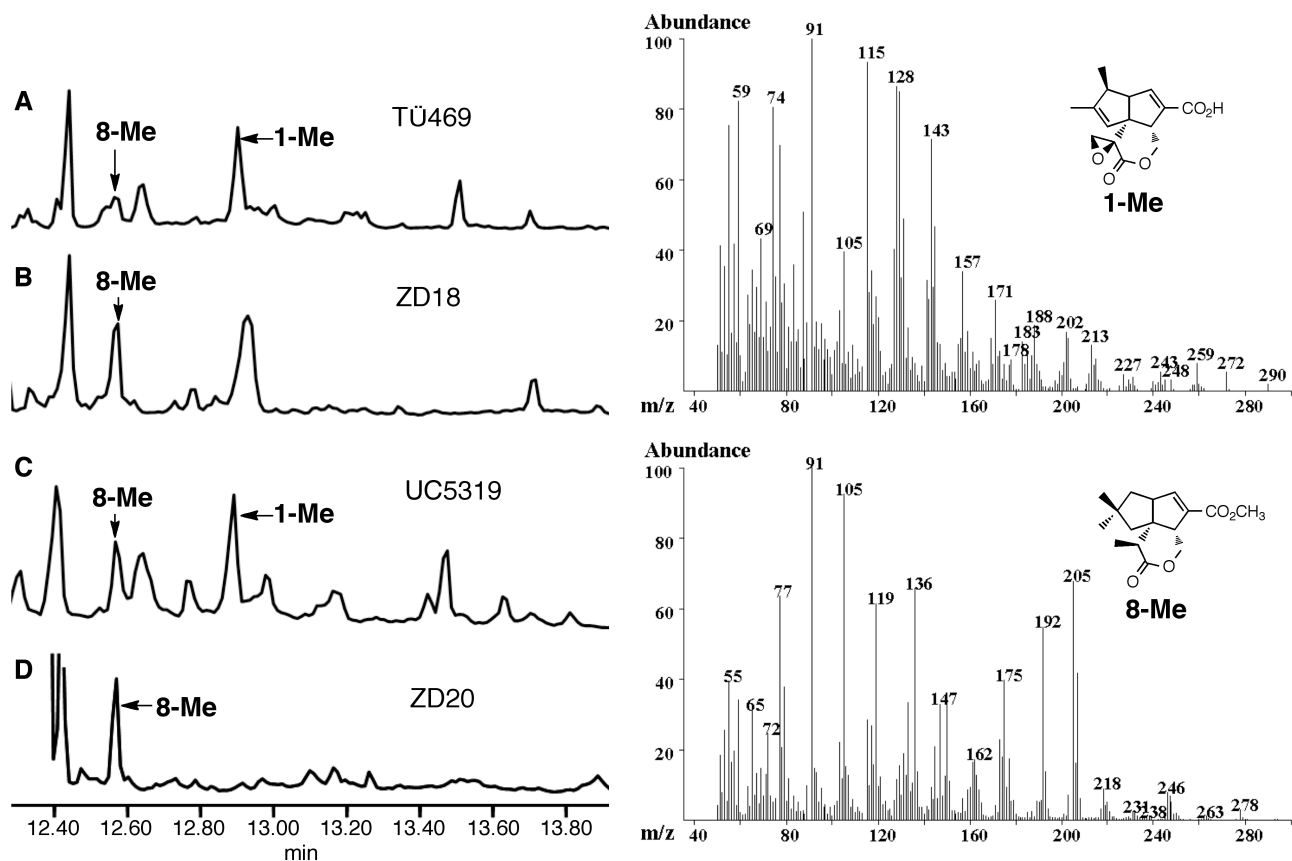

**Figure S6.** GC-MS analysis (Method 1) of ZD20 and ZD18 deletion mutants. A. Wild-type *S. arenae* TŪ469. B. *S. arenae* ZD18. C. Wild-type *S. exfoliatus* UC5319. D. *S. exfoliatus* ZD20. Under the growth conditions used for each strain, small quantities of the methyl esters of pentalenolactone E (**15-Me**) and pentalenolactone F (**16-Me**) can also be detected in the cultures of both wild-type strains on the shoulders of the peaks for **8-Me** ( $m/z$  276, rel ret time **15-Me**, -0.16 min) and **1-Me** ( $m/z$  292, rel ret time **16-Me**, -0.04 min), identical by comparison with the spectra of ret time of authentic samples.

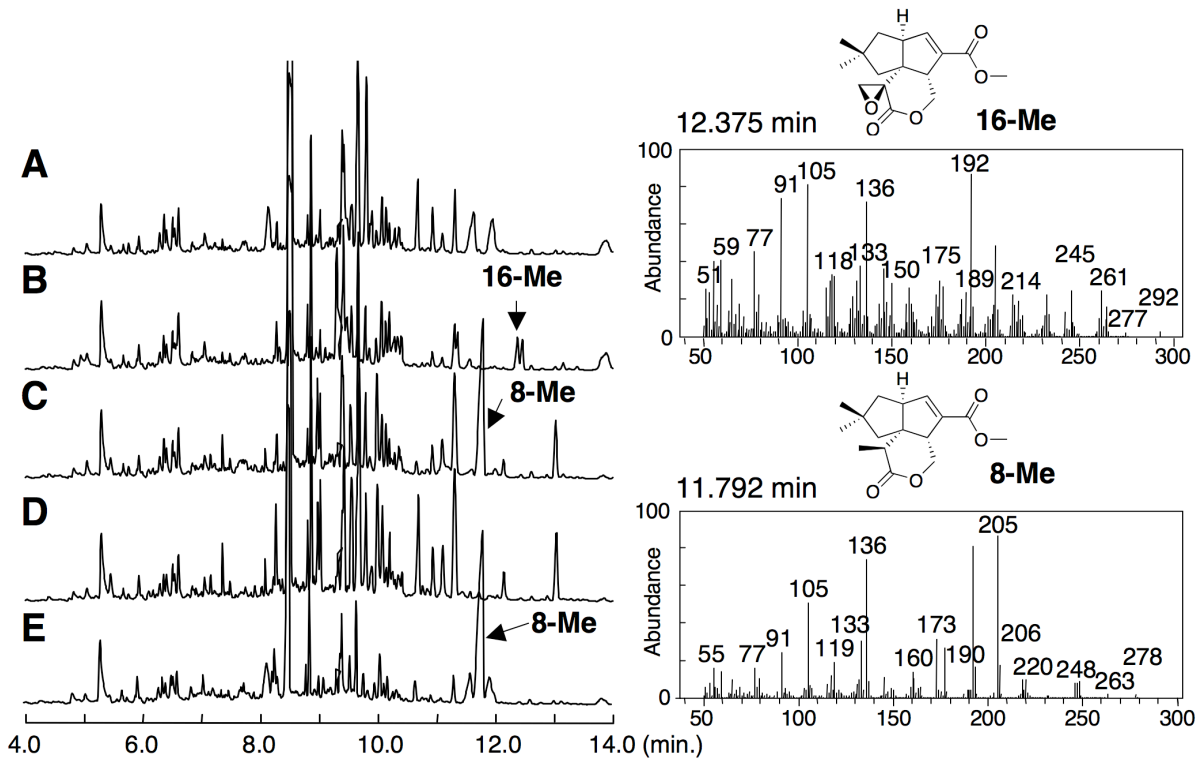

**Figure S7.** GC-MS analysis of *S. avermitilis* SUKA16  $\Delta ptlE \Delta ptlD$  double mutant and  $\Delta ptlE$  mutant complementation experiments. A.  $\Delta ptlE \Delta ptlD$  double mutant. B. Complementation of  $\Delta ptlE \Delta ptlD$  mutant with *pntE* and *pntD*. C. Complementation of  $\Delta ptlE \Delta ptlD$  mutant with *pntE*. D.  $\Delta ptlE$  mutant. E. Complementation of  $\Delta ptlE$  mutant with *pntE*.

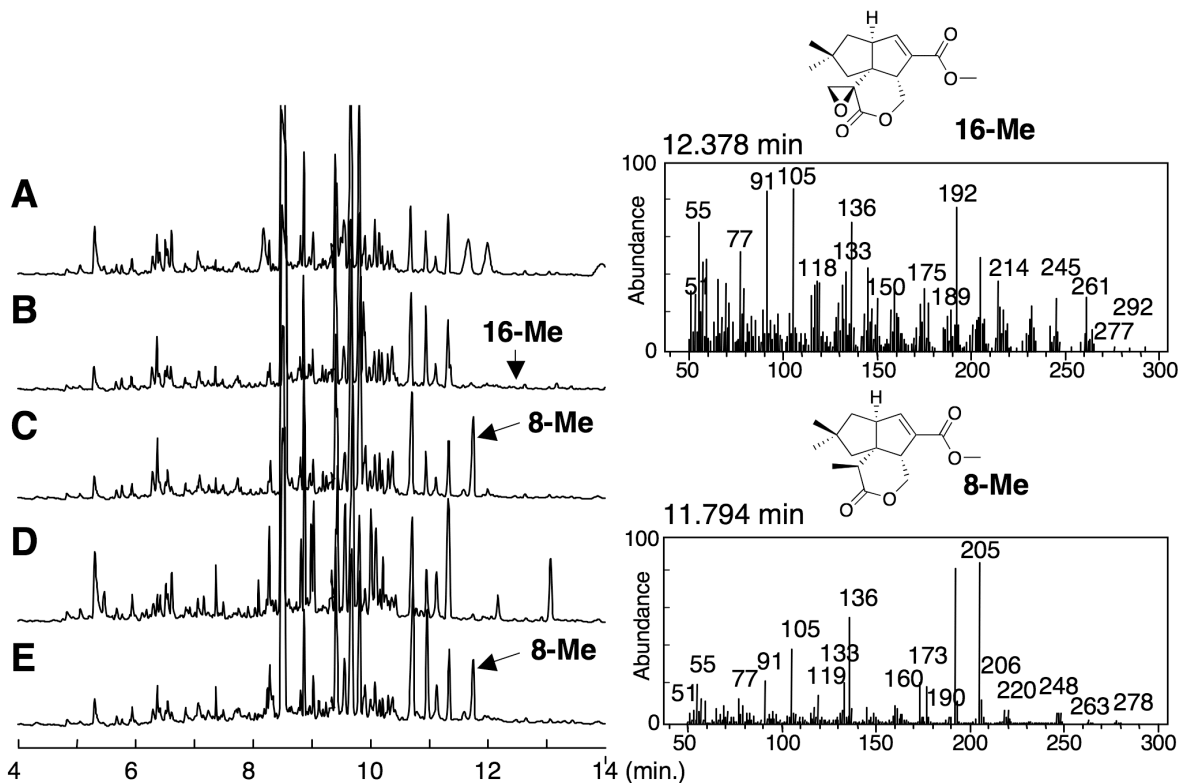

**Figure S7-2.** GC-MS analysis of *S. avermitilis* SUKA16  $\Delta ptlE \Delta ptlD$  double mutant and  $\Delta ptlE$  mutant complementation experiments. A.  $\Delta ptlE \Delta ptlD$  double mutant. B. Complementation of  $\Delta ptlE \Delta ptlD$  mutant with *penE* and *penD*. C. Complementation of  $\Delta ptlE \Delta ptlD$  mutant with *penE*. D.  $\Delta ptlE$  mutant. E. Complementation of  $\Delta ptlE$  mutant with *penE*.

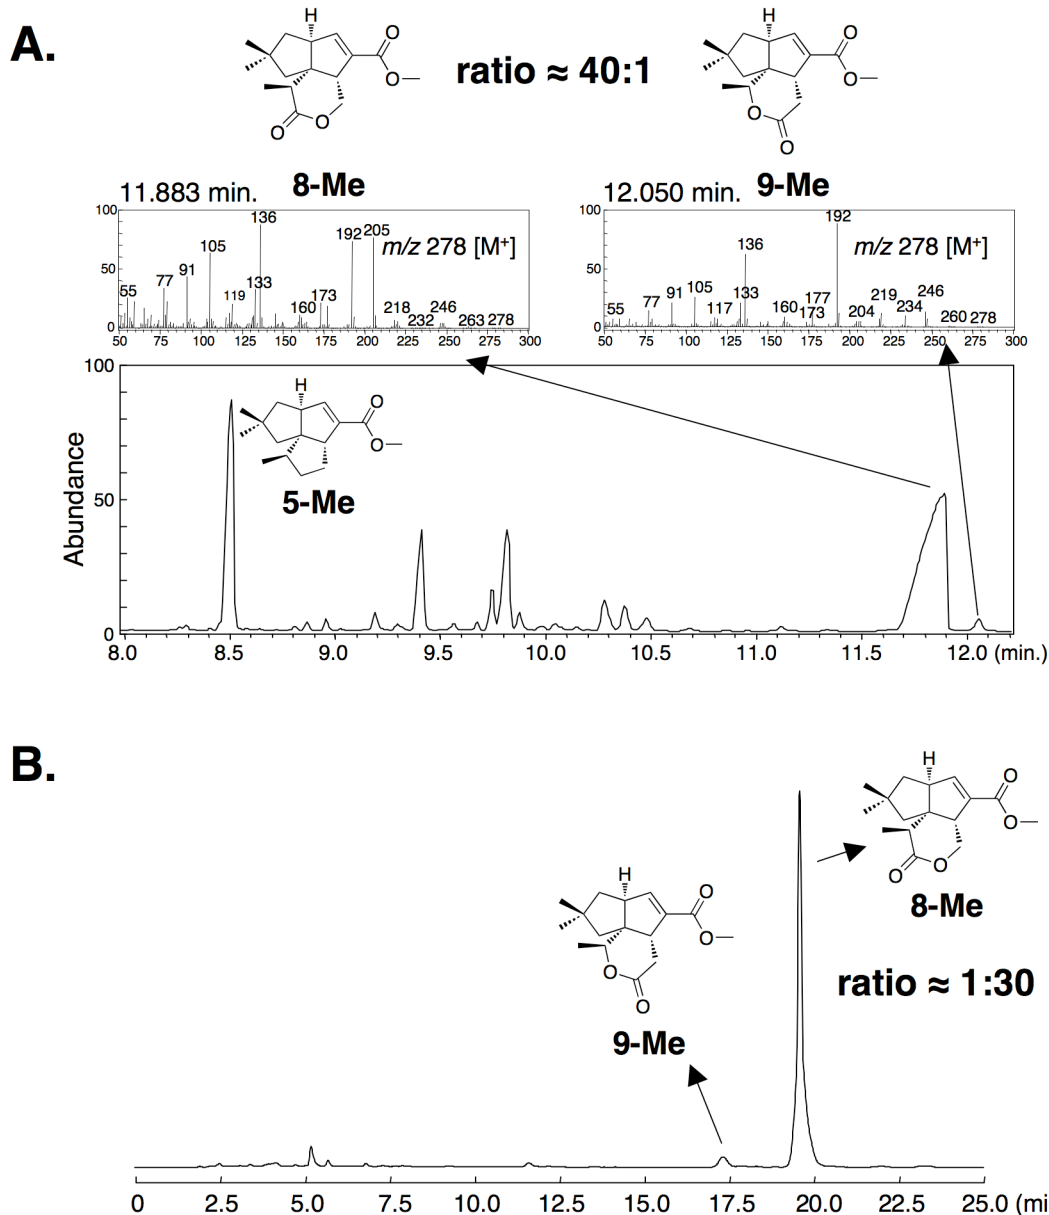

**Figure S8.** Analysis of methylated products of *S. avermitilis* SUKA16  $\Delta$ *ptlE*  $\Delta$ *ptlD* mutant complemented with *pntE*, showing formation of both pentalenolactone D methyl ester (**8-Me**) and 2-3% neopentalenolactone D (**9-Me**). Products were identified by comparison with authentic samples. A. GC-MS analysis (GC-MS Method 2). B. LC-MS analysis, ODS-HPLC.

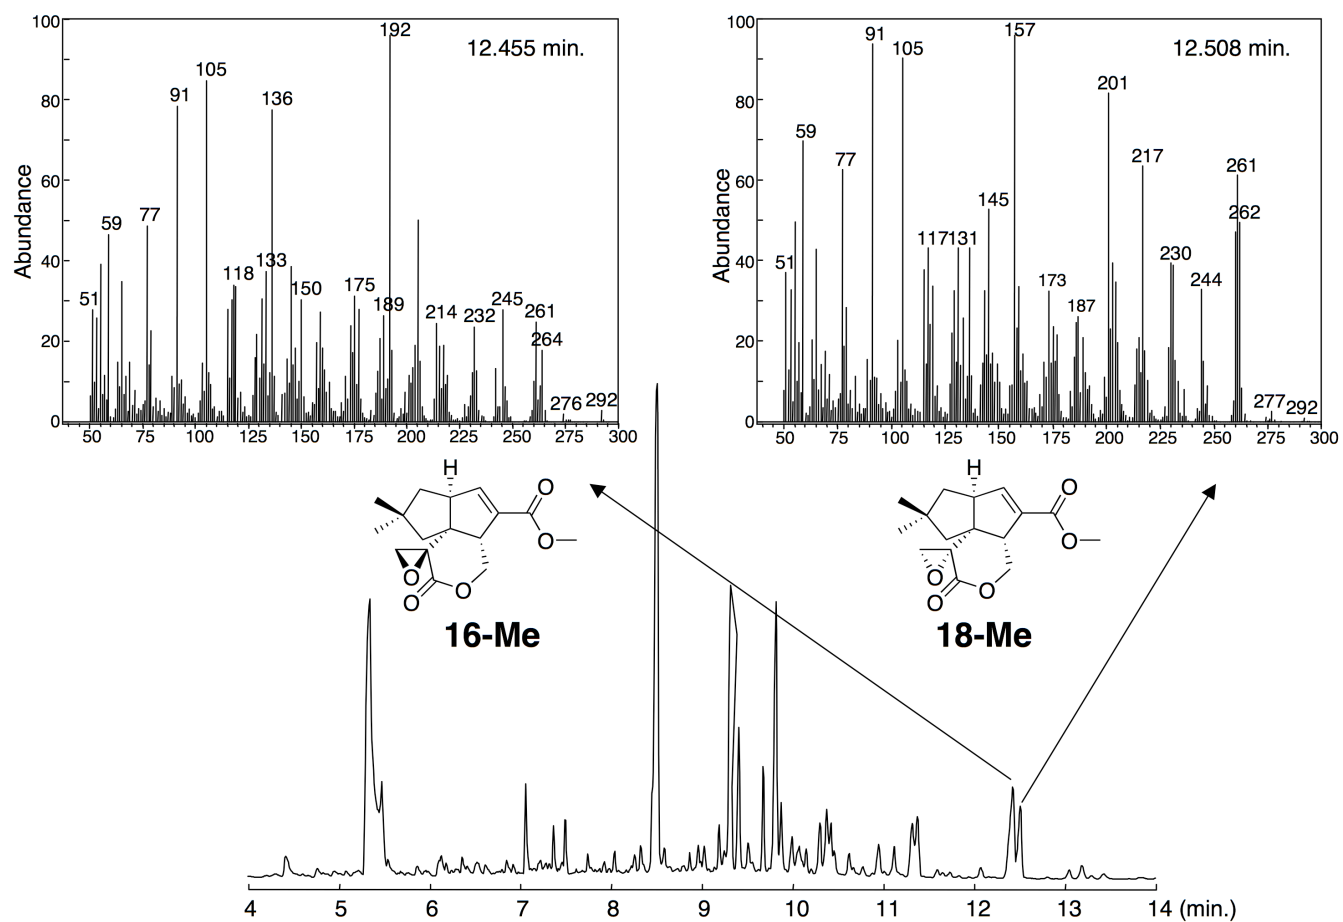

**Figure S9.** GC-MS analysis of methylated extract of *S. avermitilis* SUKA16  $\Delta ptlE \Delta ptlD$  carrying *pKU464aac(3)IV::ermEp::pntE-pntD* showing formation of both pentalenolactone F methyl ester (**16-Me**) and 9,10-*epi*-pentalenolactone F methyl ester (**18-Me**). Cf Panel B, Figure S7.



Pt1E MVDIEAVRAKYREERDKRVQADGGROYLSAQGEFAHYADDPHAKPIERAPVSDEVVDTIIGAGIGGLLLGARLREACAFDTIRLVDKAGD  
PntE -MDLEAVREKYRQERDKRGV---RTYQFARGDFSRYPYTERREPLTDEVVAVVGAGIGLLTGARLREETGLERIRLIDEAGD  
\*\*\*\*\* \*\*:\*:\*\*\*\*\* . \* \* \*:\*:\*\*\* \*\*::: \* \* \*:\*:\*\*\*\*\*:::\*\*\*\*\* \*\*\*\*\* :.: \*:\*:\* \*\*

***pt1E-pntE300***

Pt1E VGGTWYWNRFPGRLCDVESYVYMPLEELGRLPSEKYATGAEIFEHCQAIARTYDLYDEALLQTSVTELSWDEDSRRLVTRDRGDLVRS  
PntE VGGTWYWNRFPGVRCDEVESYVYMPLEELIGTIPTKEYSTGPEIFAHLQRIAHRYGLYRDALFQTTVTELRWDEAAARWLVDTRGDLFRA  
\*\*\*\*\*:::\*\*\*\*\* \*\*\*\*\* \* :\* \*\*:\*:\*\*\* \*\* \* \* \*\*:\*:\*.\*\* :\*\*\*:\*\*\*:\*\*\*\*\* \*\* \* .\*\*\*\*\* \*\*\*\*\*.\*:

***pt1E-pntE600***

Pt1E RfvamaigslhrpkLPSIPGTEAFQGHSFHTSRWDFAYTGGDISGGLKLGDKRVGIVGTGATAVQCIPHLAESAAHLYVFQRTPTSTVSV  
PntE RYVAMSIGLMHRPKLPGLPLETFAGHSFHTSRWDFGYTGGDSTGGTLGLDKRVGIVGTGSTTVQLAPHLAEWAERLYIFQRTPAAVDV  
\*.\*:\*:\* \* :\*\*\*\*\*.\*:\* \*:\* \*\*\*\*\* \*\*\*\*\* :\*\*\* \* \*\*\*\*\*:\*:\*\*\*:\*:\* \*\*\*\*\* \* :\*\*\*:\*\*\*\*\*:\*:\*:

Pt1E RNNRPTDPGWAAGLEPGWQRRMDNFHALTSGVDQDVLVDQGWTEITSKLAAILPKS-AADADPKDIGTAVELADFHKMEELRKRVDIAI  
PntE RGNRPTPPGWADGLDAGWQRRMENFHALTSGIPQDEDLVQDRWTQTAEALATAILPTGDTGGDPKERALAAERADFRKMEELRARIDSV  
\*.\*\*\*\* \* \*\* \* .\*\*\*\*\*:\*\*\*\*\*: \* \*\*\*\*\* \*\*:\*:\*\*\*: : : :.\*\*\*\*\*. \*.\* \*\* \*\*\*\*\* \*:\*:

***pt1E-pntE1200***

Pt1E VHDKDTADALPKPYRFLCKRPCFHDGYLDYFNRPVNLVDTQGRGVERLTPTS SVVAGGREYPVDCLIFASQYEFSEFGVPYTNRTGFSIVG  
PntE VTDATAAALPKPYRVYCKRPCFHDGYLQTFNRPVNLVDTQGGVERLTASGVVANGREYPVDCLIFATGQYEHFAVPYTERAGYDIVG  
\* \* \*\* \*\*\*\*\*:\*\*\*\*\*:\*:\*\*\*\*\*:\*\*\*\*\*.\*:.\*.\*.\*\*\*\*\*:\*\*\*\*\*:\*\*\* \*\*.\*\*\*\*\*\*:\*:.\*\*\*

Pt1E RDGIRLSEKWAEGARTFHGLQVNGFPNCFILSKAQSLHVNVPYMLNEQSKHVAYILKAVQQRGRQVVEASATGEKEWVETILRLANRNL  
PntE RGGVRLSEKWAQGAHTLHGLQVHGFNCFILSKVQAGRHVNIAYMLGEQTRHLAHIKCVVEERGRVVEASEAGEKEWVEEILRLASGDL  
\*.\*:\*\*\*\*\*:\*:\*:\*\*\*\*\*:\*\*\*\*\*.\*:\* \*\*\*.\*\*\*.\*:\*:\*\*\*:\*:\*:\*:\*:\*\*\*\*\* :\*\*\*\*\* \*\*\*\*\* .::

Pt1E DFTESCTPGLFNNEGNPRNVAAILNSSYGGGSVGFVNILKRWREADDLADLELREG  
PntE DFLENCTPGLYNNEGDPGGLPLLNSSYGGGSVEFVNILRRWREAGDLAGLELR--  
\*\* \*.\*\*\*\*\*\*:\*\*\*:\* .:.\*:\*\*\*\*\* \*\*\*\*\*:\*\*\*\*\*.\*.\*.\*\*\*\*\*

**Figure S10.** Alignment of amino acid sequences of Baeyer-Villiger monooxygenases, Pt1E and PntE. Underlined characters indicate characteristic motifs. Shaded boxes correspond to the junction regions for construction of Pt1E/PntE hybrid proteins.

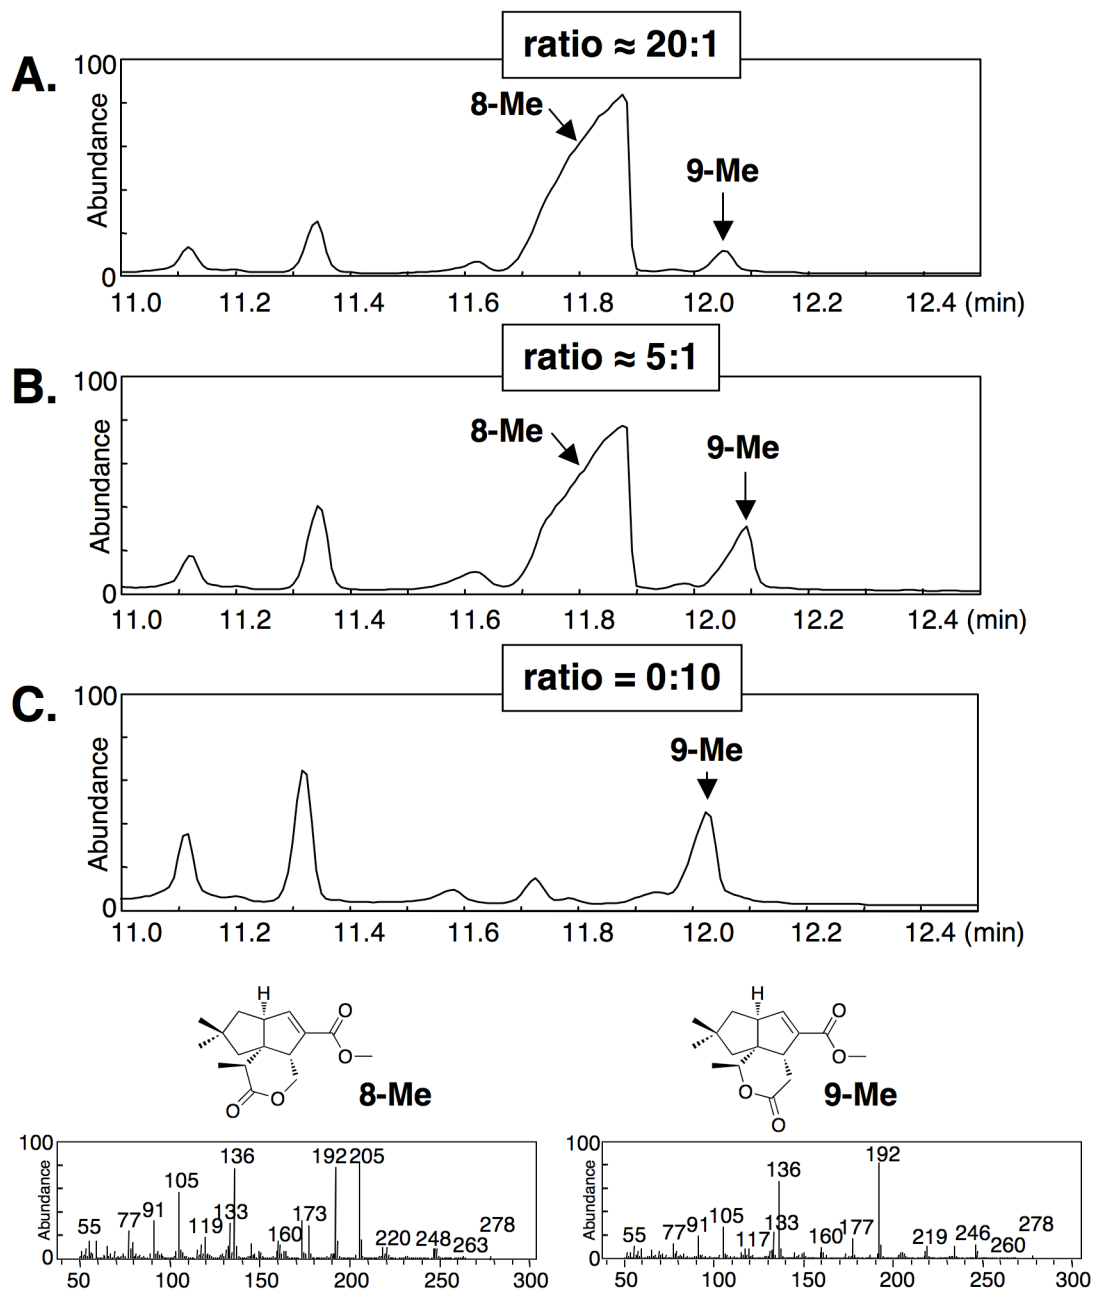

**Figure S11.** GC-MS analysis of *S. avermitilis* SUKA16  $\Delta ptlE \Delta ptlD$  double mutant complementation experiments. A. Complementation of  $\Delta ptlE \Delta ptlD$  double mutant with pKU464aac(3)IV::ermEp::ptlE/pntE300. B. Complementation of  $\Delta ptlE \Delta ptlD$  mutant with pKU464aac(3)IV::ermEp::ptlE/pntE600. C. Complementation of  $\Delta ptlE \Delta ptlD$  mutant with pKU464aac(3)IV::ermEp::ptlE/pntE1200.

## References

1. Martin, D. G., Slomp, G., Mizsak, S., Duchamp, D. J., and Chidester, C. G. (1970) The structure and absolute configuration of pentalenolactone (PA 132), *Tetrahedron Lett.*, 4901-4904.
2. Keller-Schierlein, W., Lemke, J., Nyfeler, R., and Zähler, H. (1972) Stoffwechselprodukte von Mikroorganismen. 105. Arenaemycin E, D, und C., *Arch. Mikrobiol.* 84, 301-316.
3. Jiang, J., Tetzlaff, C. N., Takamatsu, S., Iwatsuki, M., Komatsu, M., Ikeda, H., and Cane, D. E. (2009) Genome mining in *Streptomyces avermitilis*: A biochemical Baeyer-Villiger reaction and discovery of a new branch of the pentalenolactone family tree, *Biochemistry* 48, 6431-6440.
4. Paget, M. S., Chamberlin, L., Atrih, A., Foster, S. J., and Buttner, M. J. (1999) Evidence that the extracytoplasmic function sigma factor *sigmaE* is required for normal cell wall structure in *Streptomyces coelicolor* A3(2), *J. Bacteriol.* 181, 204-211.
5. Macneil, D. J., Gewain, K. M., Ruby, C. L., Dezeny, G., Gibbons, P. H., and Macneil, T. (1992) Analysis of *Streptomyces-Avermitilis* genes required for avermectin biosynthesis utilizing a novel integration vector, *Gene* 111, 61-68.
6. Gust, B., Challis, G. L., Fowler, K., Kieser, T., and Chater, K. F. (2003) PCR-targeted *Streptomyces* gene replacement identifies a protein domain needed for biosynthesis of the sesquiterpene soil odor geosmin, *Proc. Natl. Acad. Sci. U S A* 100, 1541-1546.
7. Datsenko, K. A., and Wanner, B. L. (2000) One-step inactivation of chromosomal genes in *Escherichia coli* K-12 using PCR products, *Proc. Natl. Acad. Sci. U S A* 97, 6640-6645.
8. Short, J. M., Fernandez, J. M., Sorge, J. A., and Huse, W. D. (1988) Lambda ZAP: a bacteriophage lambda expression vector with *in vivo* excision properties, *Nucl. Acids Res.* 16, 7583-7600.
9. Alting-Mees, M. A., and Short, J. M. (1989) pBluescript II: gene mapping vectors, *Nucl. Acids Res.* 17, 9494.
10. Sun, Y., Zhou, X., Liu, J., Bao, K., Zhang, G., Tu, G., Kieser, T., and Deng, Z. (2002) '*Streptomyces nanchangensis*', a producer of the insecticidal polyether antibiotic nanchangmycin and the antiparasitic macrolide meilingmycin, contains multiple polyketide gene clusters, *Microbiology* 148, 361-371.
11. Bierman, M., Logan, R., O'Brien, K., Seno, E. T., Rao, R. N., and Schonert, B. E. (1992) Plasmid cloning vectors for the conjugal transfer of DNA from *Escherichia coli* to *Streptomyces* spp, *Gene* 116, 43-49.
12. He, Y., Wang, Z., Bai, L., Liang, J., Zhou, X., and Deng, Z. (2010) Two pHZ1358-derivative vectors for efficient gene knockout in *Streptomyces*, *J. Microbiol. Biotechnol.* 20, 678-682.
